# Supplementary material for: Hypoxia-inducible factor prolyl-4-hydroxylase-1 is a convergent point in the reciprocal negative regulation of NF-κB and p53 signaling pathways
Source: PubMed Central journal article supplement (PMC5722952; doi:10.1038/s41598-017-17376-0), 2017-12-08
Supplement: 41598_2017_17376_MOESM1_ESM.pdf [file 41598_2017_17376_MOESM1_ESM.pdf]

**Hypoxia-inducible factor prolyl-4-hydroxylase-1 is a convergent point in the reciprocal negative regulation of NF- $\kappa$ B and p53 signaling pathways**

Karim Ullah<sup>1,2,3</sup>, Ann-Helen Rosendahl<sup>1,2,3</sup>, Valerio Izzì<sup>1,2,3</sup>, Ulrich Bergmann<sup>2</sup>, Taina Pihlajaniemi<sup>1,2,3</sup>, Joni M. Mäki<sup>1,2,3</sup>, Johanna Myllyharju<sup>1,2,3</sup>

<sup>1</sup>Oulu Center for Cell-Matrix Research, <sup>2</sup>Biocenter Oulu and <sup>3</sup>Faculty of Biochemistry and Molecular Medicine, University of Oulu, FIN-90014, Finland

**Supplementary data file**

**Contents:**

Legends to supplementary figures 1-5

Supplementary figures 1-5

Supplementary tables 1-4

Supplementary tables 5-7 are uploaded as separate source data files

**Supplementary Figure 1.** Generation of *Hif-p4h-1*<sup>-/-</sup> mice. (a) Schematic representation of the gene targeting strategy. The organization of the wt gene, the targeting construct, and the structure of the locus following gene targeting are shown. Exons are depicted as gray boxes and numbered. The location of PCR primers and *Spe I* restriction sites used for Southern hybridization with 3' probe for detection of the gene targeting event are shown. (b) Schematic representation of the outcome of the in-frame deletion of exon 3 at protein level. The deleted exon 3 codes for two catalytically critical amino acid residues (H309 and D311) required Fe<sup>2+</sup> binding and thus the deleted protein is an inactive HIF-P4H-1. (c) Identification of the targeting in ES cells by using the 3' probe and *Spe I* digestion in Southern blots, where 9.8-kb wt (+) and 5.2-kb *Hif-p4h-1* mutant (-) *Spe I* fragments were identified, as expected. (d) Genotyping by using PCR of genomic DNA from F2 generation mice showing 2.2-kb and 1.7-kb bands for wt (+) and *Hif-p4h-1* mutant alleles (-), respectively. (e) Deletion of exon 3 was confirmed at the mRNA level by PCR of cDNA isolated from wt and *Hif-p4h-1*<sup>-/-</sup> mice. PCR primers Hif-p4h-1qP2ex1F and Hif-p4h-1qP4ex1R from exons 2 and 4, respectively, were used to confirm deletion of exon 3. As a result 245-bp wt (+) and 125-bp mutant (-) bands were amplified. (f) Western blot analysis of HIF-P4H-1 in wt and *Hif-p4h-1*<sup>-/-</sup> MEFs.

**Supplementary Figure 2.** Relative *HIF-P4H-1* mRNA expression in (a) HEK293 and (b) *HIF1A*<sup>-/-</sup> HCT-116 cells transfected with scrambled or *HIF-P4H-1* siRNA. \**P*<0.05, \*\**P*<0.01 and \*\*\**P*<0.001, two-tailed Student's t-test.

**Supplementary Figure 3.** Flag-tagged p53 was immunoprecipitated from HCT-116 cells treated with 10 μg cisplatin and 10 μM MG132 for 6 h, separated by SDS-PAGE, trypsinized and analyzed by LC-MS. Mass signals extracted from the high energy trace of the MS<sup>e</sup> measurement assigned to the peptide TCPVQLWVDSTPPPGTR (140-156) are shown. MS/MS spectra of (a) the p53 wt peptide 140-156 and (b) the Pro142Ala mutant. A detailed list of all found fragment ions is given in supplementary Tables 5 (wt p53) and 6 (Pro142Ala mutant).

**Supplementary Figure 4.** Lack of HIF-P4H-1 increases the apoptotic activity in mouse skin. Histological analysis of apoptotic cells in the skin stained by TUNEL immunofluorescent staining

using Hoechst (1:10000) stain as counterstaining.

**Supplementary Figure 5.** Scans of developed films with approximate regions used for figures marked with rectangles and molecular sizes indicated in kDa (based on prestained protein markers).

# Suppl. FIGURE 1.

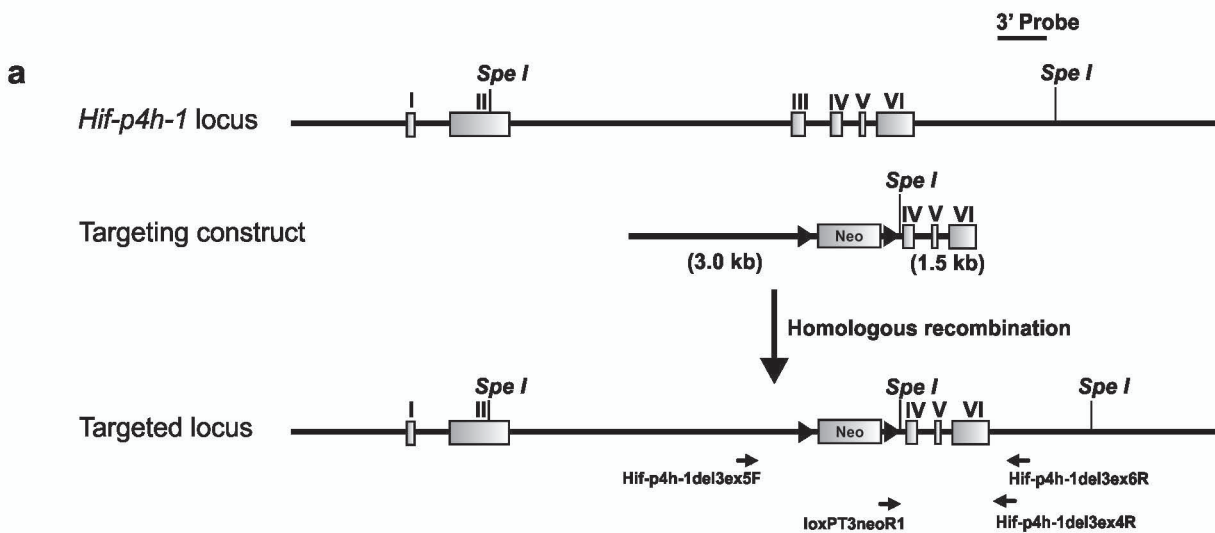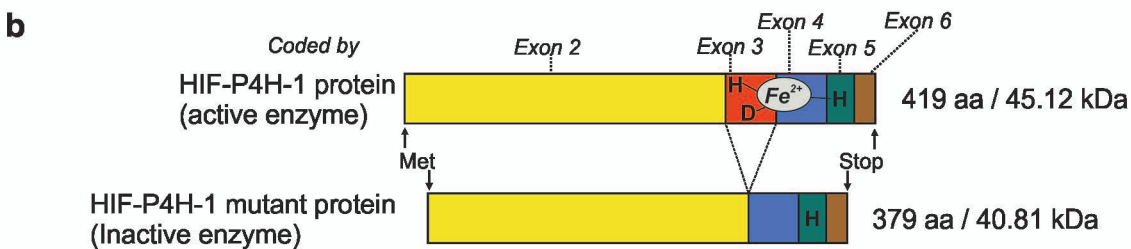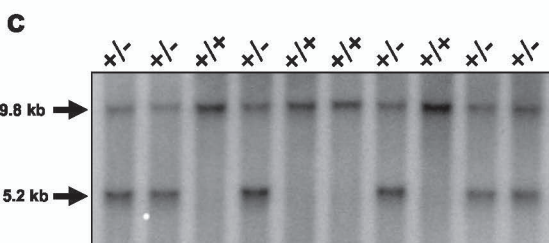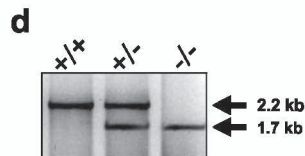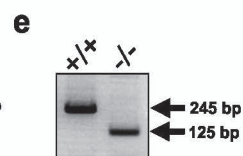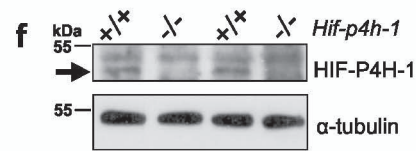

# Suppl. FIGURE 2.

## A

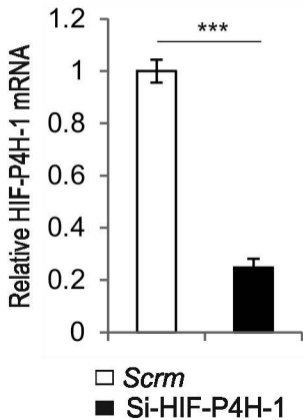

## B

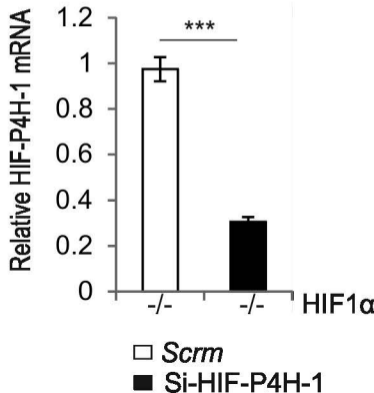

# Suppl. FIGURE 3.

## A

Precursor mass 1910.9392, charge 2.06

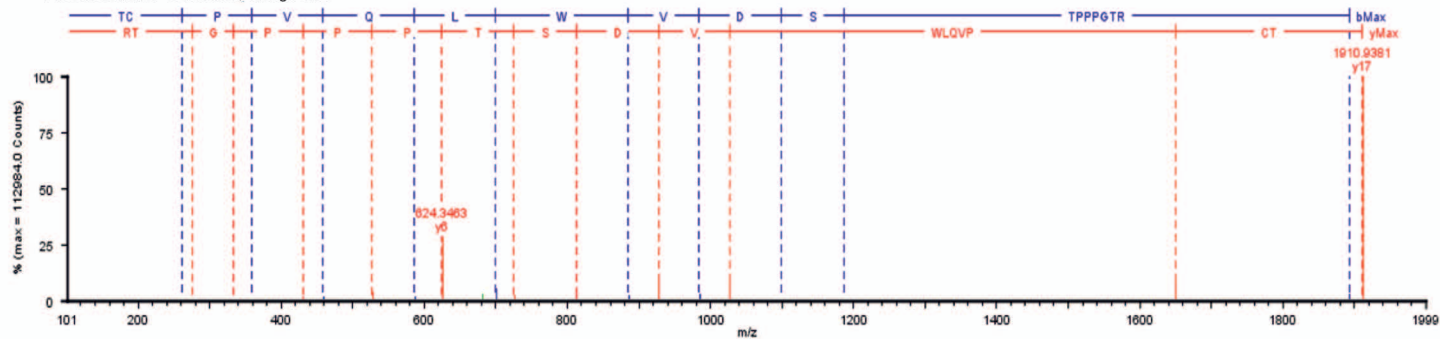

## B

Precursor mass 1884.9348, charge 2.07

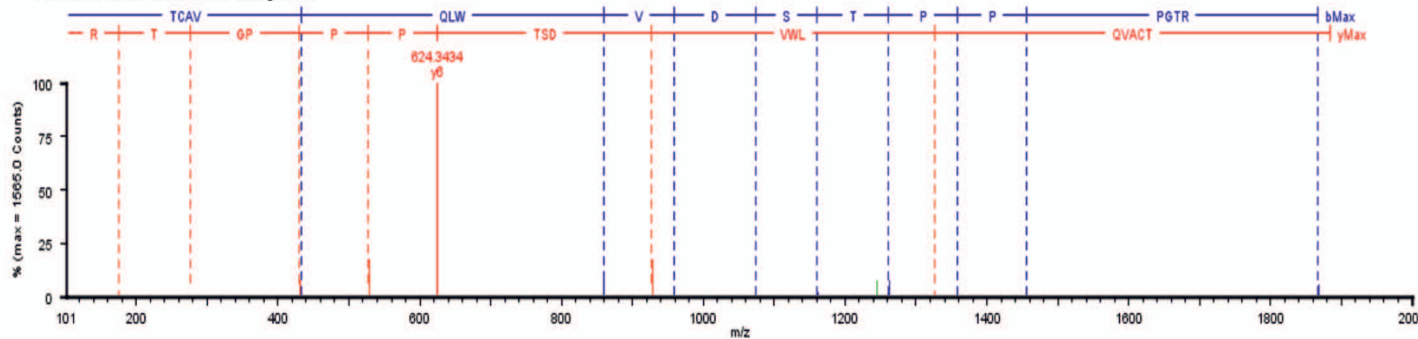

Suppl. FIGURE 4.

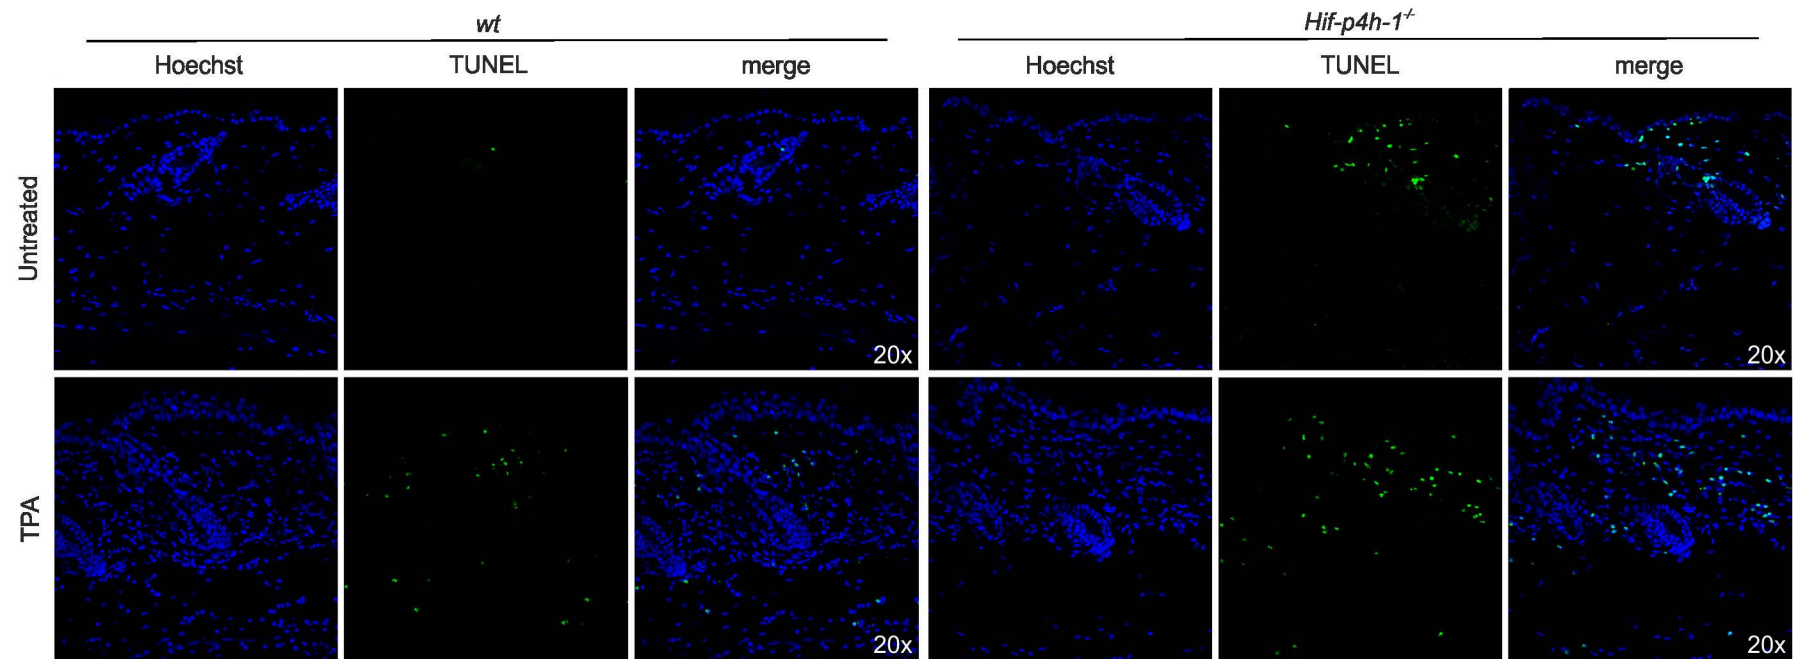

Supplementary Figure 5

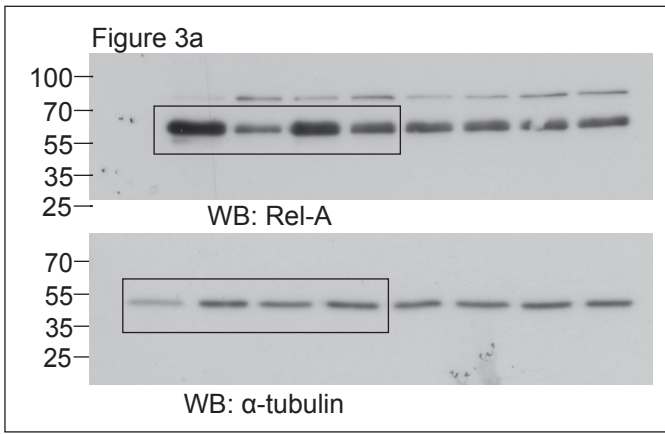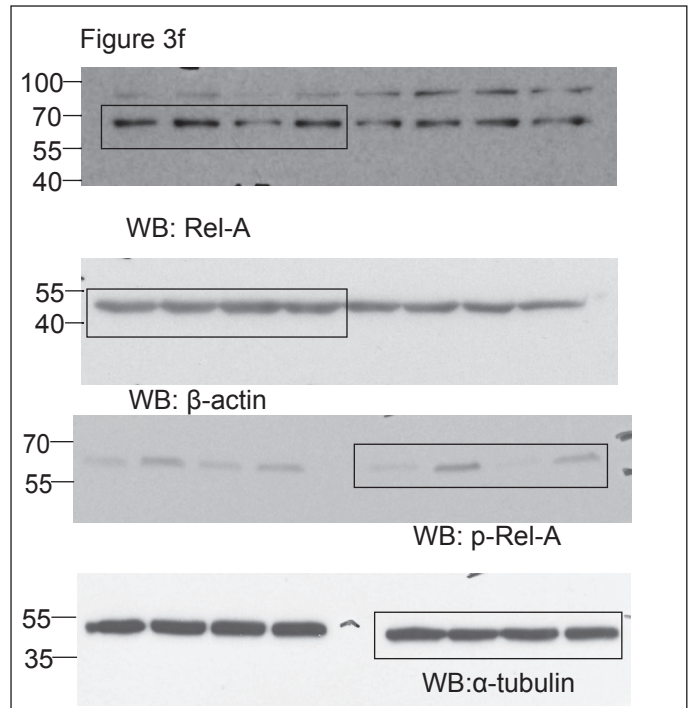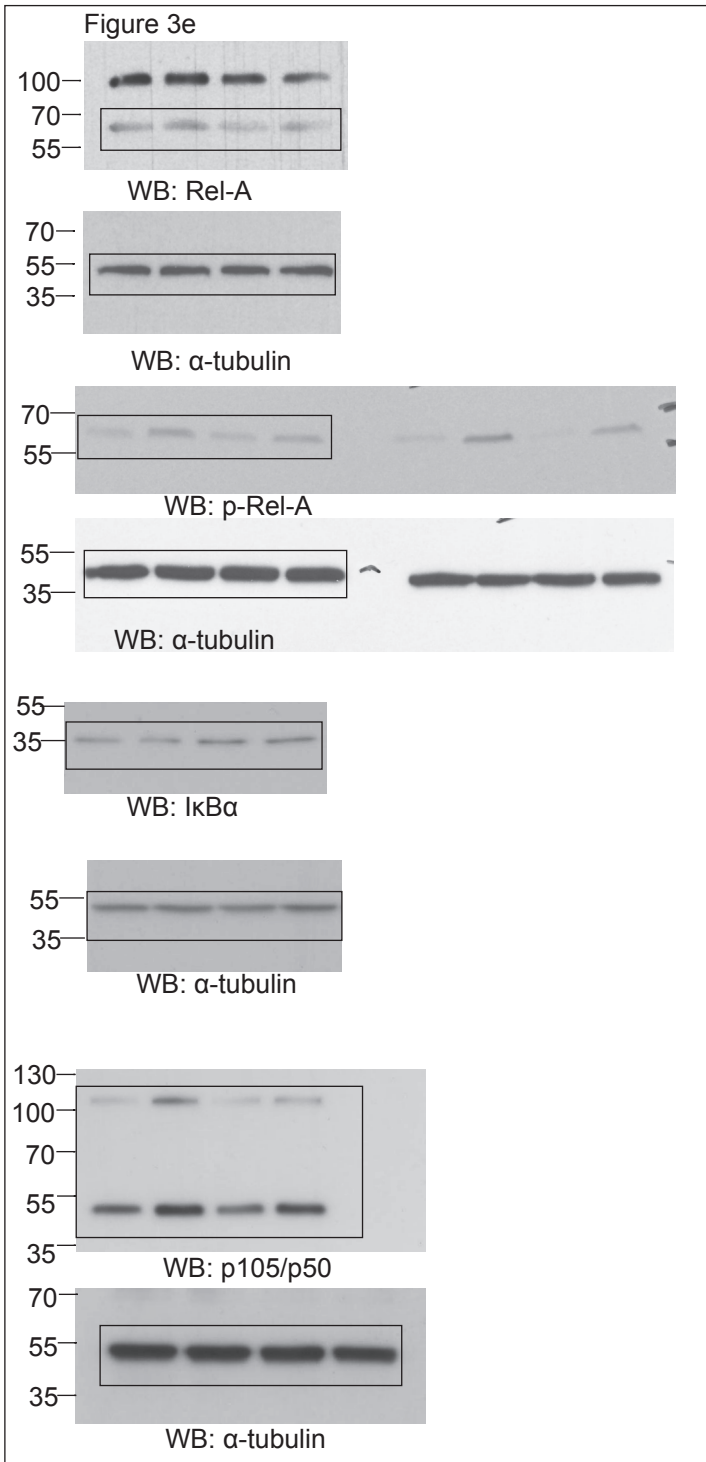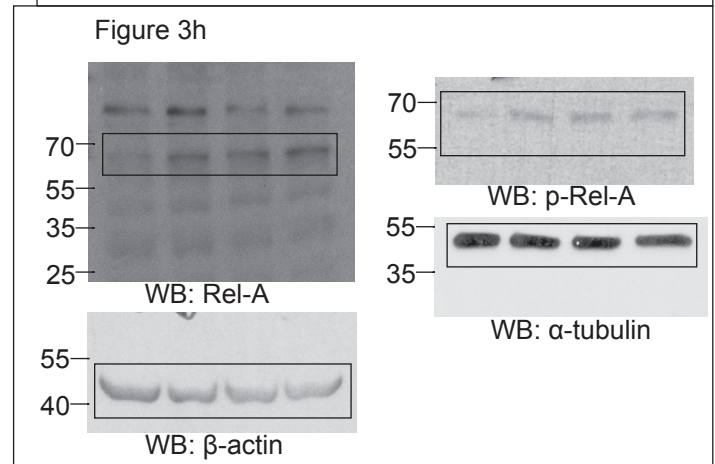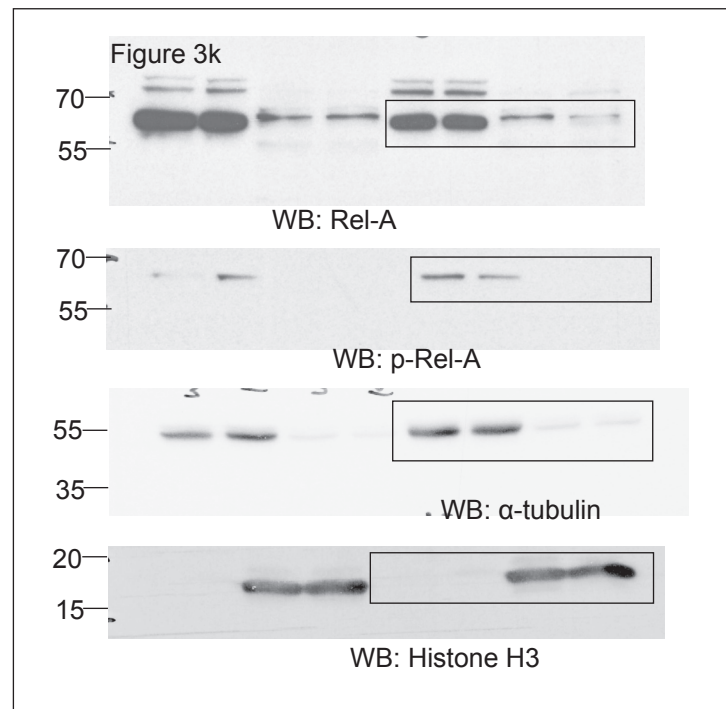



Supplementary Figure 5

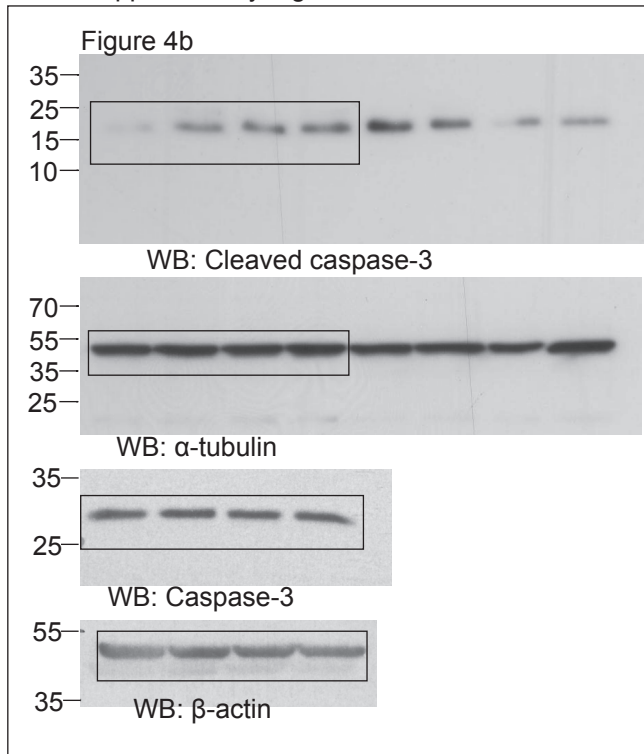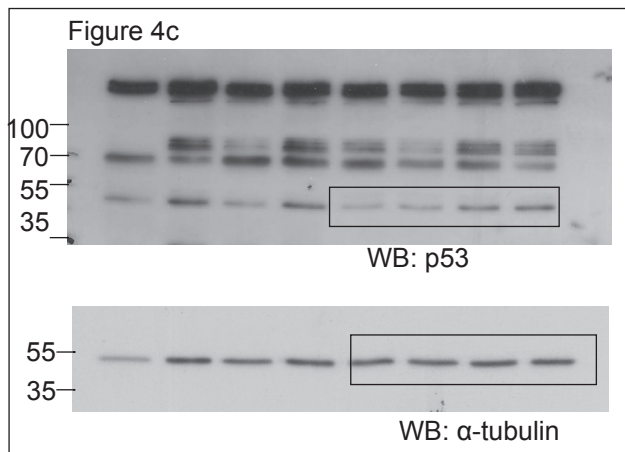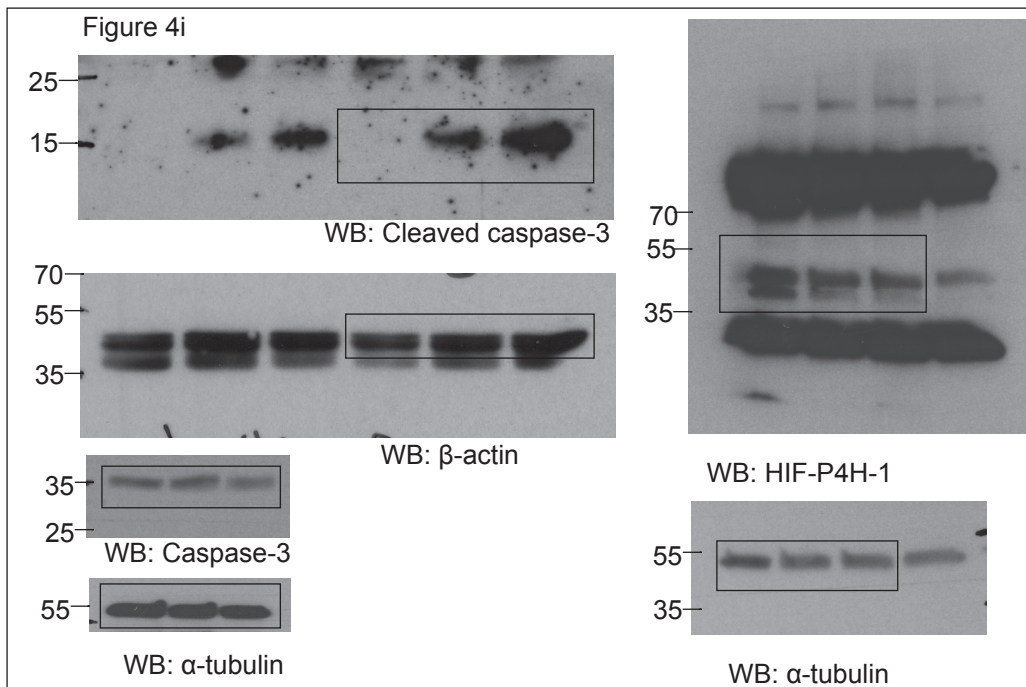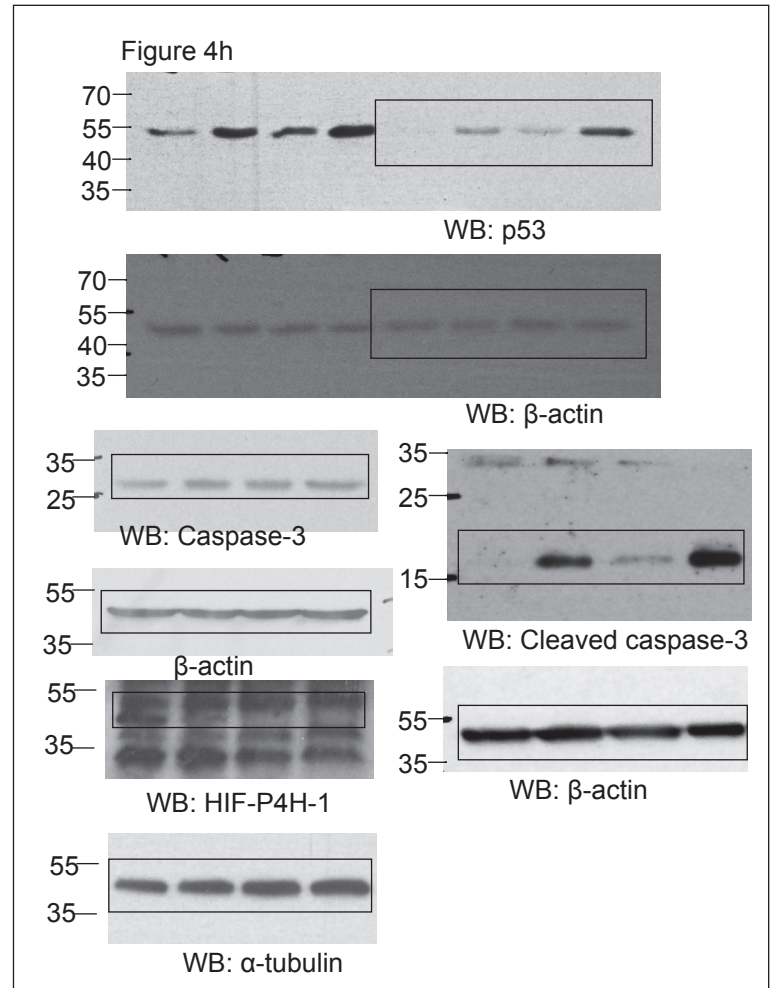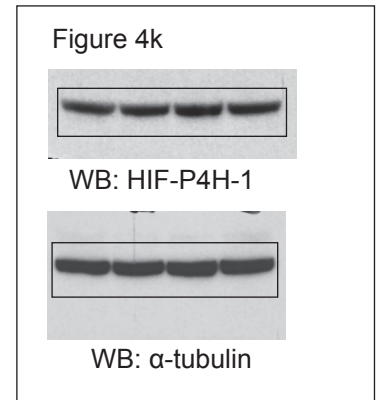

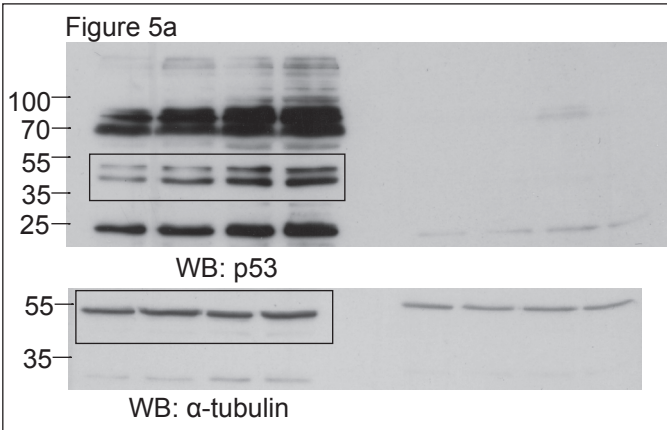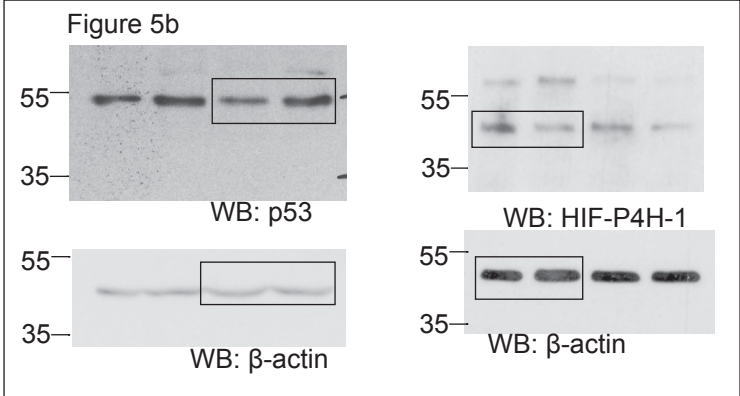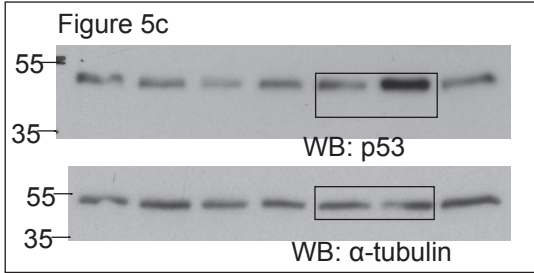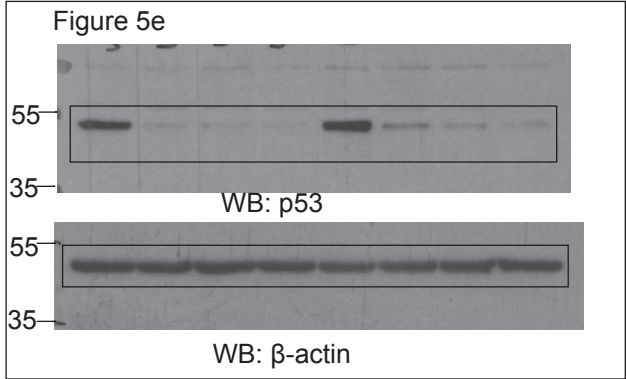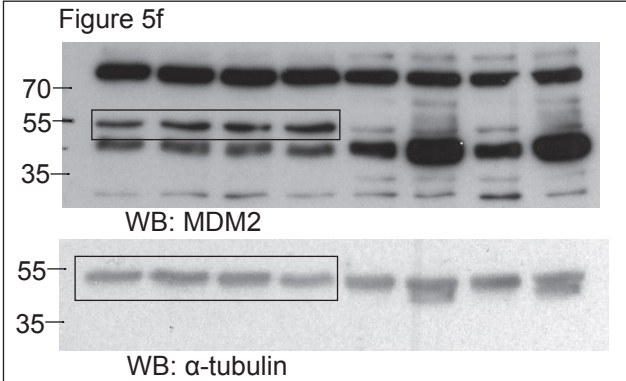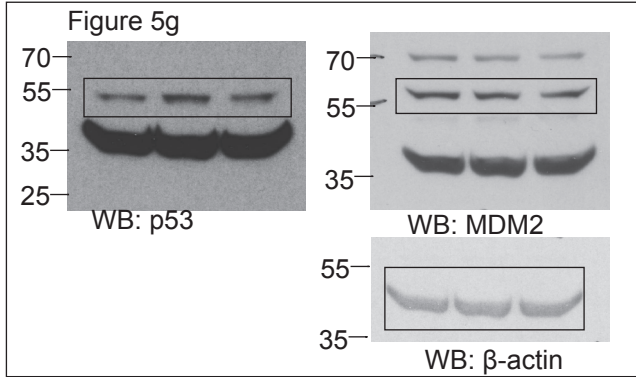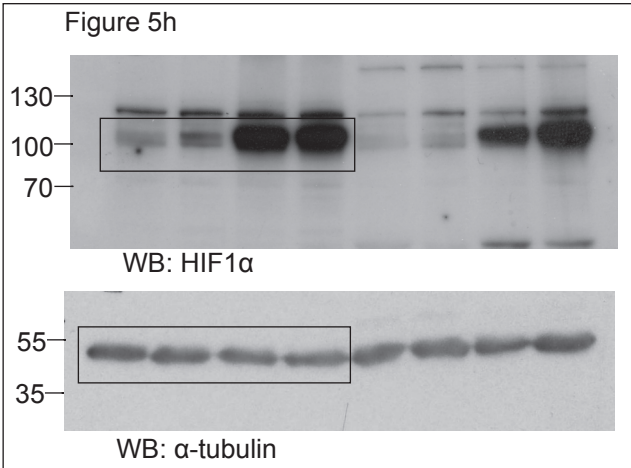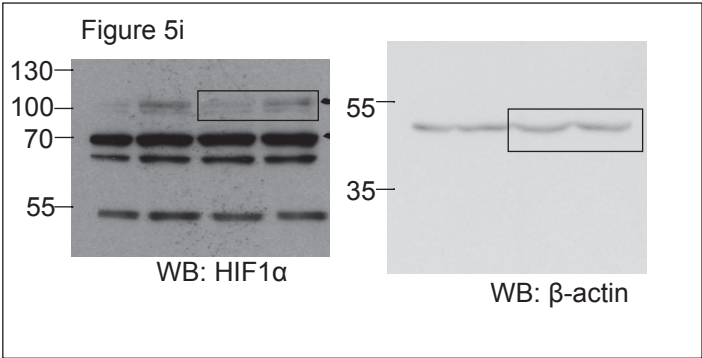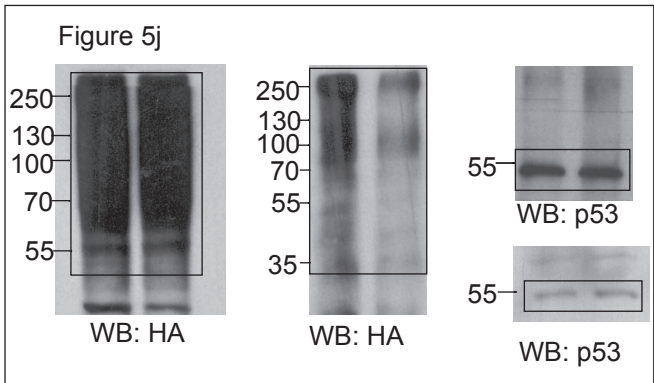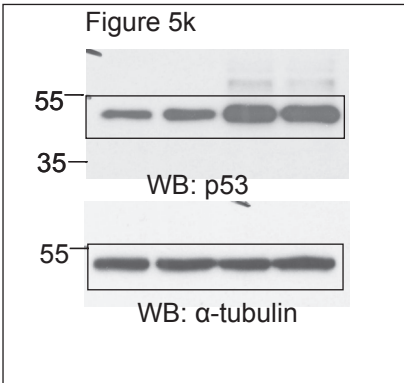

Supplementary Figure 5

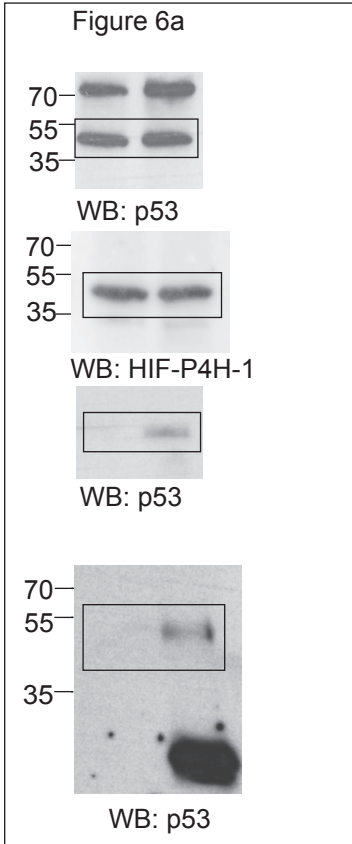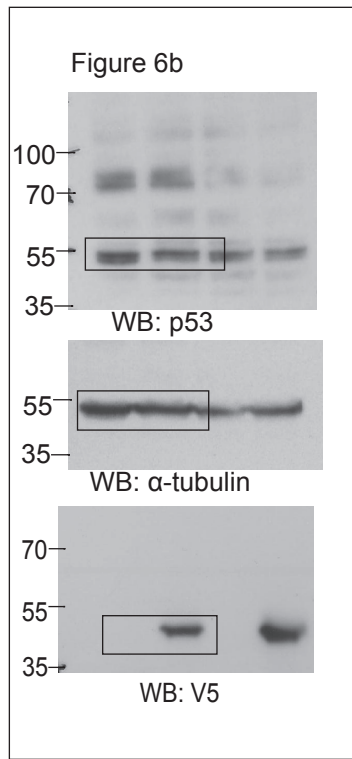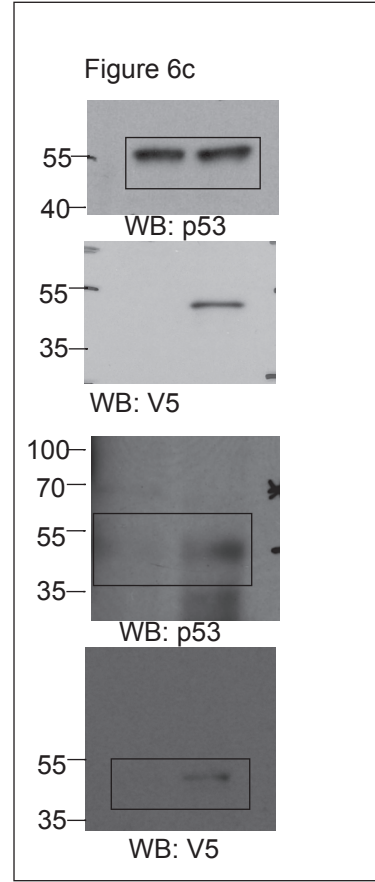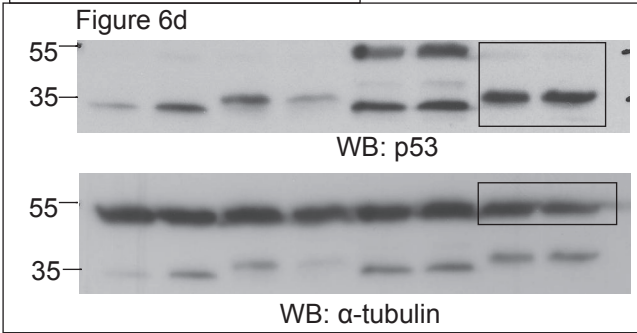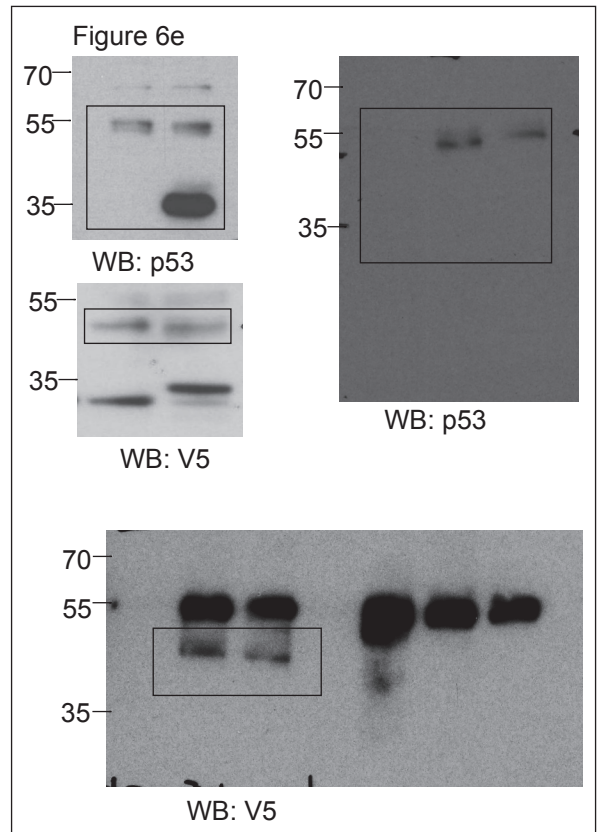

Supplementary Figure 5

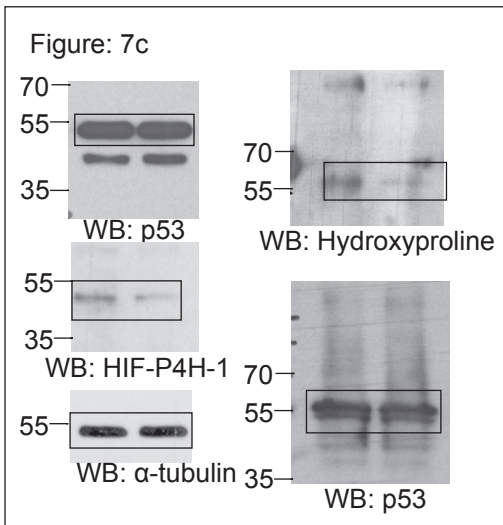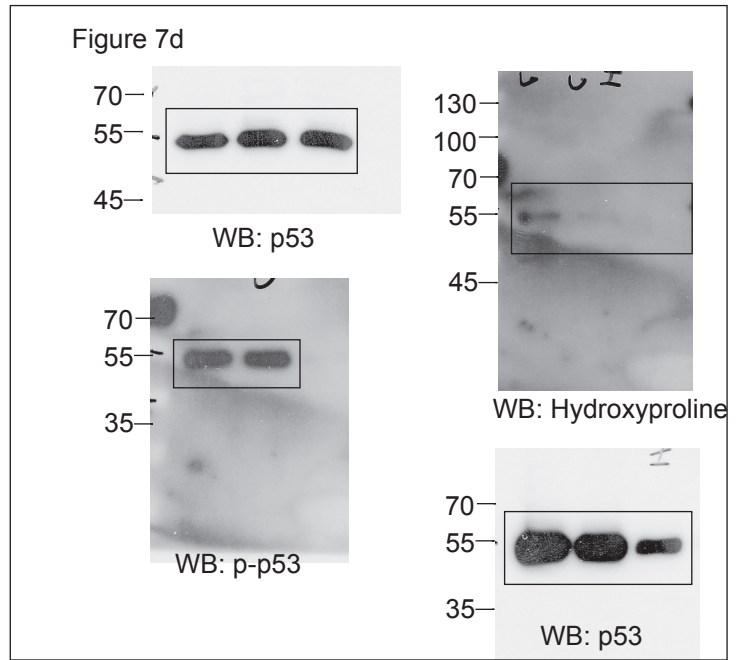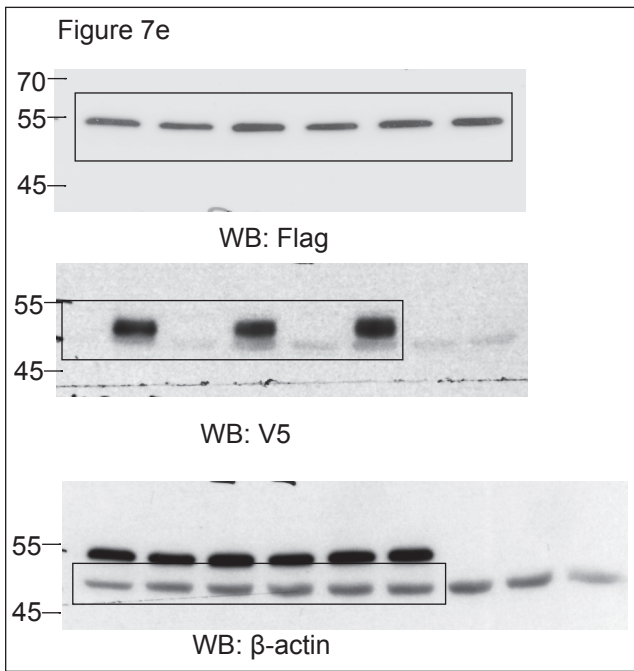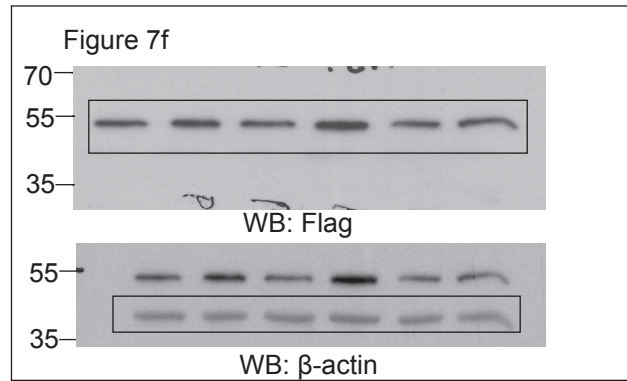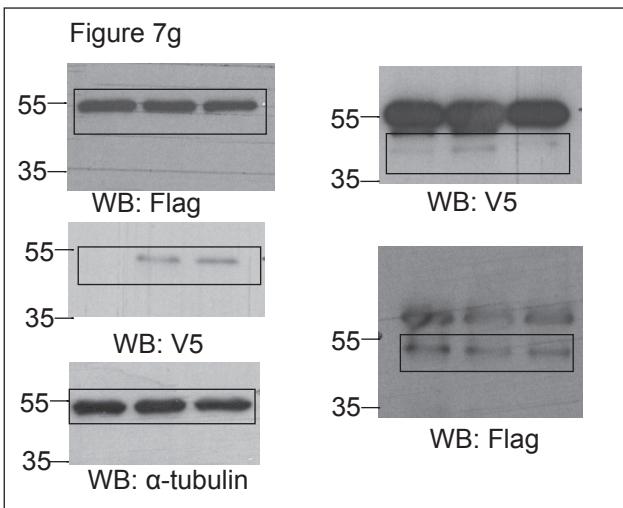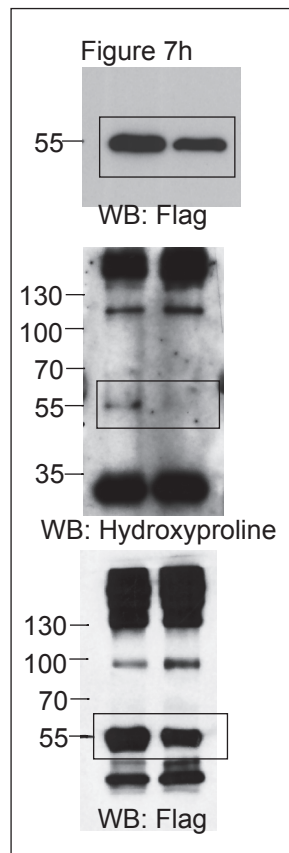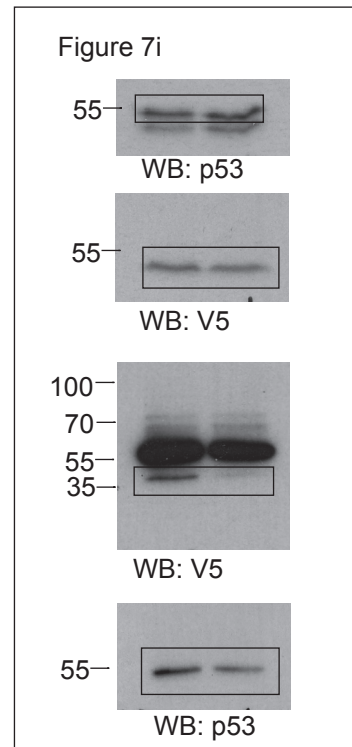

## Supplementary Figure 5

Suppl. Figure 1c

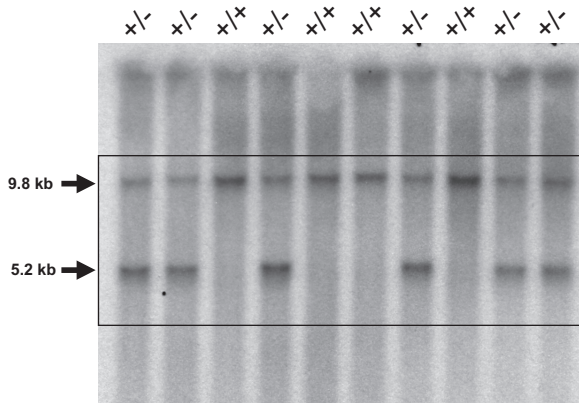

Suppl. Figure 1f

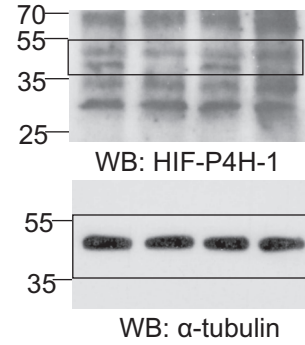

Suppl. Figure 1d

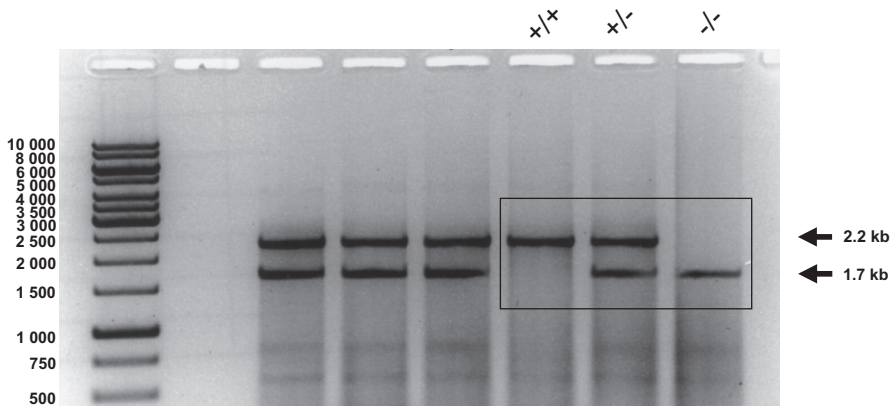

Suppl. Figure 1e

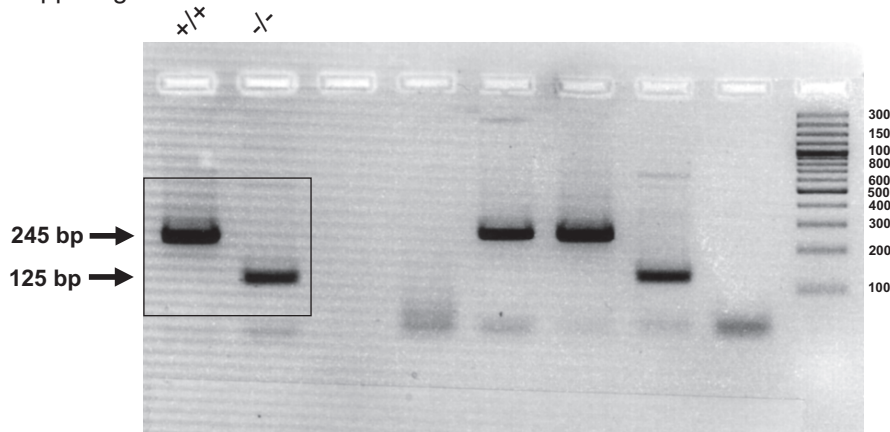

**Suppl. Table 1.** Inflammatory genes that are downregulated in *Hif-p4h-1<sup>-/-</sup>* MEFs relative to wt according to microarray analysis. Mean values of two separate microarray analyses of individual MEF isolates are shown.

| Gene Name | Accession no. | Fold change<br><i>Hif-p4h-1<sup>-/-</sup></i> /wt in Normoxia | Fold change<br><i>Hif-p4h-1<sup>-/-</sup></i> /wt in Hypoxia |
|-----------|---------------|---------------------------------------------------------------|--------------------------------------------------------------|
| C1qc      | NM_007574     | -6.845                                                        | -5.955                                                       |
| Fcgr3     | NM_010188     | -5.325                                                        | -2.475                                                       |
| Fcer1g    | NM_010185     | -5.115                                                        | -3.765                                                       |
| C1qa      | NM_007572     | -4.465                                                        | -5.935                                                       |
| Ctss      | NM_021281     | -3.87                                                         | -3.025                                                       |
| C1qb      | BB111335      | -2.575                                                        | -2.53                                                        |
| Tac1      | NM_009311     | -2.455                                                        | -1.985                                                       |
| C1qb      | AW227993      | -2.2                                                          | -2.315                                                       |
| Ednra     | AW558570      | -1.745                                                        | -0.56                                                        |
| Cxcl10    | NM_021274     | -1.7                                                          | -1.54                                                        |
| Ptgis     | NM_008968     | -1.635                                                        | -1.67                                                        |
| Ctla2a    | NM_007796     | -1.37                                                         | -1.44                                                        |
| Nov       | X96585        | -1.36                                                         | -1.26                                                        |
| S1pr3     | AV238324      | -1.35                                                         | -1.3                                                         |
| Tnfaip6   | NM_009398     | -1.31                                                         | -1.305                                                       |
| Cxcl1     | BB554288      | -1.195                                                        | -1.275                                                       |
| Chst2     | NM_018763     | -1.19                                                         | -1.35                                                        |
| Jmjd3     | AW763746      | -1.135                                                        | -1.245                                                       |
| Cd14      | NM_009841     | -0.195                                                        | -1.395                                                       |
| Ash1l     | BG694892      | -0.09                                                         | -1.205                                                       |
| Igfbp4    | BB787243      | -0.05                                                         | 0.085                                                        |
| Tnfrsf1a  | L26349        | 0.035                                                         | 1.165                                                        |
| Tnfrsf1a  | L26349        | 0.035                                                         | 1.165                                                        |
| Slit2     | BG963150      | 0.11                                                          | 0.095                                                        |
| Tgm2      | AW321975      | 0.19                                                          | 0.2                                                          |
| Serpine1  | NM_008871     | 0.19                                                          | 0.17                                                         |
| Fabp4     | NM_024406     | 0.74                                                          | 0.115                                                        |
| Cxcl5     | NM_009141     | 0.765                                                         | 0.465                                                        |
| Il1rl1    | D13695        | 1.14                                                          | 1.27                                                         |
| C1qtnf3   | NM_030888     | 1.62                                                          | 1.43                                                         |

**Suppl. Table 2.** Changes in the expression level of apoptotic genes in *Hif-p4h-1<sup>-/-</sup>* MEFs relative to wt according to microarray analysis. . Mean values of two separate microarray analyses of individual MEF isolates are shown.

| Gene Name | Accession no. | Fold change<br><i>Hif-p4h-1<sup>-/-</sup></i> /wt in<br>Normoxia | Fold change<br><i>Hif-p4h-1<sup>-/-</sup></i> /wt in<br>Hypoxia |
|-----------|---------------|------------------------------------------------------------------|-----------------------------------------------------------------|
| Perp      | NM_022032     | 2.285                                                            | 2.015                                                           |
| Bnip3     | NM_009760     | 1.775                                                            | -1.04                                                           |
| Tnfrsf11b | AB013898      | 1.55                                                             | 1.23                                                            |
| Bid       | NM_007544     | 1.4                                                              | 1.35                                                            |
| Ripk2     | NM_138952     | 1.38                                                             | 0.325                                                           |
| Sulf1     | BB065799      | 1.34                                                             | 1.285                                                           |
| Gadd45g   | AK007410      | 1.325                                                            | 0.225                                                           |
| Pmaip1    | NM_021451     | 1.315                                                            | 1.505                                                           |
| Hmox1     | NM_010442     | 1.26                                                             | 1.2                                                             |
| Trp53inp1 | AW495711      | 1.165                                                            | 1.315                                                           |
| Bcl2l1    | NM_009743     | 1.135                                                            | 1.22                                                            |
| Aen       | BI440638      | 1.075                                                            | 1.255                                                           |
| Trp53     | BB828014      | 1.025                                                            | 1.725                                                           |
| Gadd45b   | AK010420      | 0.185                                                            | 0.195                                                           |
| App       | NM_007471     | 0.15                                                             | 1.18                                                            |
| Sgk1      | NM_011361     | 0.15                                                             | -0.03                                                           |
| Ppp1r13l  | BB752796      | 0.105                                                            | 0.165                                                           |
| Bcap31    | AV066734      | 0.055                                                            | 1.145                                                           |
| Dap       | BC024876      | 0.055                                                            | 1.2                                                             |
| Tnfrsf12a | NM_013749     | 0.04                                                             | 0.115                                                           |
| Tnfrsf1a  | L26349        | 0.035                                                            | 1.165                                                           |
| Mcl1      | BC003839      | 0.02                                                             | 1.165                                                           |
| Zmat3     | NM_009517     | 0.015                                                            | 0.16                                                            |
| Cflar     | BC023121      | 0.01                                                             | 0.11                                                            |
| Ckap2     | BM208103      | 0.01                                                             | 1.24                                                            |
| Rad21     | AF332085      | -0.02                                                            | -0.18                                                           |
| Egln3     | BB284358      | -0.04                                                            | -1.19                                                           |
| Cadm1     | NM_018770     | -0.55                                                            | -0.275                                                          |
| Phf17     | BG065238      | -1.155                                                           | -1.18                                                           |
| Tgfbr1    | BM248342      | -1.185                                                           | -1.23                                                           |
| Bcl2l11   | BB667581      | -1.195                                                           | -1.235                                                          |
| Gas2      | NM_008087     | -1.255                                                           | -1.215                                                          |
| Trib3     | BB508622      | -1.265                                                           | -1.12                                                           |
| Peg3      | AB003040      | -1.295                                                           | -1.275                                                          |

**Suppl. Table 3.** Changes in the expression level of anti-apoptotic genes in *Hif-p4h-1<sup>-/-</sup>* MEFs relative to wt according to microarray analysis

| Gene name | Accession no. | Fold change<br><i>Hif-p4h-1<sup>-/-</sup></i> /wt in<br>Normoxia | Fold change<br><i>Hif-p4h-1<sup>-/-</sup></i> /wt in<br>Hypoxia |
|-----------|---------------|------------------------------------------------------------------|-----------------------------------------------------------------|
| Fcer1g    | NM_010185     | -5.115                                                           | -3.765                                                          |
| Krt18     | NM_010664     | -1.73                                                            | -1.525                                                          |
| Kitl      | BB815530      | -1.23                                                            | -1.345                                                          |
| Tgfb1     | BM248342      | -1.185                                                           | -1.23                                                           |
| Bcl11b    | BM117007      | -1.175                                                           | -0.185                                                          |
| Fgfr1     | M33760        | -0.13                                                            | -1.31                                                           |
| Chst11    | AK003880      | -0.01                                                            | -0.035                                                          |
| Atf5      | AF375476      | -0.005                                                           | -0.085                                                          |
| Cflar     | BC023121      | 0.01                                                             | 0.11                                                            |
| Btg2      | NM_007570     | 0.065                                                            | 1.485                                                           |
| Cdkn1a    | AK007630      | 0.075                                                            | 1.255                                                           |
| Htt       | L23312        | 0.08                                                             | 1.405                                                           |
| Ercc5     | BM198879      | 0.1                                                              | 0.21                                                            |
| Grina     | AW212189      | 0.11                                                             | 0.115                                                           |
| Cacna1a   | AB066608      | 0.2                                                              | 1.38                                                            |
| Hspa1b    | M12573        | 1.035                                                            | 1.195                                                           |
| Bcl2l1    | NM_009743     | 1.135                                                            | 1.22                                                            |
| Spp1      | NM_009263     | 1.145                                                            | 1.155                                                           |
| Prnp      | BE630020      | 1.2                                                              | 0.165                                                           |
| Foxc2     | NM_013519     | 1.21                                                             | 0.23                                                            |
| Bnip3l    | AK018668      | 1.24                                                             | -0.02                                                           |
| Hmox1     | NM_010442     | 1.26                                                             | 1.2                                                             |
| Tgfb3:    | BC014690      | 1.34                                                             | 1.375                                                           |
| Bdnf      | AY057913      | 1.365                                                            | 1.275                                                           |
| Vnn1      | NM_011704     | 1.59                                                             | 0.72                                                            |
| Vegfa     | NM_009505     | 1.59                                                             | -0.09                                                           |
| Msx2      | NM_013601     | 1.86                                                             | 1.95                                                            |



**Suppl. Table 4.** Primer sequences used in qPCR analysis.

| Target          | Direction | Sequence (5'-3')             |
|-----------------|-----------|------------------------------|
| FCGR3           | Forward   | 5-TCGGTGTCAAATGGAGCAGACC-3   |
|                 | Reverse   | 5-CTATGGCACCTTAGCGTGATGG-3   |
| C1QA            | Forward   | 5-GTGGCTGAAGATGTCTGCCGAG-3   |
|                 | Reverse   | 5-TTAAAACCTCGGATACCAGTCCG-3  |
| CXCL10          | Forward   | 5-ATCATCCCTGCGAGCCTATCCT-3   |
|                 | Reverse   | 5-GACCTTTTTTGGCTAAACGCTTTC-3 |
| C1QC            | Forward   | 5-AAGGACGGGCATGATGGACTCC-3   |
|                 | Reverse   | 5-TTTCCCACGGTGGCCAGGCAT-3    |
| PERP            | Forward   | 5-TCCAGACATCGTCGCTTTGGTG-3   |
|                 | Reverse   | 5-AGAGAATGAAGCAGATGCACAGG-3  |
| BNIP3           | Forward   | 5-GCTCCAAGAGTTCTCACTGTGAC-3  |
|                 | Reverse   | 5-GTTTTTCTCGCCAAAGCTGTGGC-3  |
| IL6             | Forward   | 5-TACCACTTCACAAGTCGGAGGC-3   |
|                 | Reverse   | 5-CTGCAAGTGCATCATCGTTGTTC-3  |
| COX2            | Forward   | 5-GCGACATACTCAAGCAGGAGCA-3   |
|                 | Reverse   | 5-AGTGGTAACCGCTCAGGTGTTG-3   |
| Mouse TNF A     | Forward   | 5-GGTGCCTATGTCTCAGCCTCTT-3   |
|                 | Reverse   | 5-GCCATAGAACTGATGAGAGGGAG-3  |
| Human-TNF-A     | Forward   | 5-CTCTTCTGCCTGCTGCACTTTG-3   |
|                 | Reverse   | 5-ATGGGCTACAGGCTTGCTACTC-3   |
| PDK1            | Forward   | 5-CCACTGAGGAAGATCGACAGAC-3   |
|                 | Reverse   | 5-AGAGGCGTGATATGGGCAATCC-3   |
| P53             | Forward   | 5-CACGTA CTCTCCTCCCCTCA-3    |
|                 | Reverse   | 5-AACTGCACAGGGCACGTCTT-3     |
| HIF1 $\alpha$   | Forward   | 5-GGCGAGAACGAGAAGAAAAA-3     |
|                 | Reverse   | 5-AAGTGGCAACTGATGAGCAA-3     |
| Human HIF-P4H-1 | Forward   | 5-CTGTCTGGTATTTTGATGCCAAGG-3 |
|                 | Reverse   | 5-CGGCTGTGATACAGGTA CTGG-3   |
| Mouse REL A     | Forward   | 5-TGAACCGAAACTCTGGCAGCTG-3   |
|                 | Reverse   | 5-CATCAGCTTGCGAAAAGGAGCC-3   |
